# Supplementary material
Source: PubMed Central journal article supplement (PMC4148417)

## Supplemental Figures and Tables

**Supplemental Table 1.** Characteristics of patients by cardiac rehabilitation referral 2007-12.

|                                 | <b>Overall</b> | <b>Not Referred</b> | <b>Referred</b> |
|---------------------------------|----------------|---------------------|-----------------|
|                                 | (n = 301247)   | (n = 67327)         | (n = 233920)    |
| Age, years (median)             | 62             | 64                  | 61              |
| Female, %                       | 32             | 37                  | 31              |
| Race/Ethnicity, %               |                |                     |                 |
| White                           | 83             | 77                  | 85              |
| Black                           | 10             | 13                  | 9               |
| Asian                           | 1              | 2                   | 1               |
| Hispanic                        | 4              | 6                   | 4               |
| Other                           | 1              | 1                   | 1               |
| Insurance, %                    |                |                     |                 |
| HMO/Private                     | 58             | 54                  | 59              |
| Medicare                        | 23             | 27                  | 22              |
| Medicaid                        | 4              | 5                   | 4               |
| Self/None                       | 12             | 12                  | 12              |
| <u>Clinical History</u>         |                |                     |                 |
| BMI, kg/m <sup>2</sup> (median) | 29             | 28                  | 29              |
| Current Smoker, %               | 38             | 34                  | 40              |
| Hypertension, %                 | 70             | 74                  | 69              |
| Dyslipidemia, %                 | 59             | 60                  | 59              |
| Diabetes Mellitus, %            | 29             | 33                  | 28              |

|                        |    |    |    |
|------------------------|----|----|----|
| On Dialysis, %         | 3  | 3  | 1  |
| Prior Heart Failure, % | 9  | 14 | 8  |
| Prior PCI, %           | 24 | 26 | 23 |

Hospitalization

|                               |    |    |    |
|-------------------------------|----|----|----|
| STEMI on admission, %         | 42 | 31 | 45 |
| Catheterization, %            | 92 | 83 | 95 |
| PCI (NSTEMI) , %              | 55 | 41 | 61 |
| CABG, %                       | 9  | 4  | 10 |
| Ejection Fraction , %         |    |    |    |
| ≥ 50%, Normal                 | 58 | 59 | 58 |
| 40-49%, Mild                  | 22 | 20 | 23 |
| 25-39%, Moderate              | 16 | 15 | 16 |
| <25%, Severe                  | 4  | 4  | 3  |
| Length of Stay, days (median) | 3  | 3  | 3  |

Hospital Characteristics

|                                   |     |     |     |
|-----------------------------------|-----|-----|-----|
| Region, %                         |     |     |     |
| West                              | 13  | 17  | 12  |
| Northeast                         | 8   | 11  | 7   |
| Midwest                           | 32  | 20  | 35  |
| South                             | 47  | 52  | 46  |
| Academic, %                       | 25  | 28  | 25  |
| Bed size, number of beds (median) | 407 | 402 | 407 |

---

Values presented as column % or median.  $p < 0.0001$  for all characteristics by Wilcoxon rank sum test for continuous variables and Mantel-Haenszel chi-square test for categorical variables. For multi-level categorical variables, significance at the overall group level. Abbreviations: HMO: health maintenance organization; BMI: body mass index; PCI: percutaneous coronary intervention; CABG: coronary artery bypass graft; STEMI: ST elevation myocardial infarction; NSTEMI: non-ST elevation myocardial infarction.

**Supplemental Table 2.** Multivariate predictors of referral to cardiac rehabilitation in 2007 – 12.

| <b>Predictor</b>                       | <b>X<sup>2</sup></b> | <b>Adjusted OR (95%CI)</b> | <b>p value</b> |
|----------------------------------------|----------------------|----------------------------|----------------|
| CABG in the hospital                   | 312                  | 4.82 (4.05, 5.74)          | <0.0001        |
| PCI in the hospital                    | 285                  | 2.41 (2.17, 2.67)          | <0.0001        |
| Catheterization in the hospital        | 86                   | 1.62 (1.47, 1.80)          | <0.0001        |
| LV ejection fraction (vs. $\geq 50$ %) | 44                   |                            | <0.0001        |
| 40-49% (mildly reduced)                |                      | 1.08 (1.02, 1.14)          | 0.005          |
| 25-39% (moderately reduced)            |                      | 1.05 (0.99, 1.11)          | 0.12           |
| < 25% (severely reduced)               |                      | 1.01 (0.92, 1.11)          | 0.81           |
| Missing or not evaluated               |                      | 0.76 (0.69, 0.84)          | <0.0001        |
| STEMI on admission                     | 39                   | 1.33 (1.22, 1.45)          | <0.0001        |
| Hospital Region (vs. West)             | 37                   |                            | <0.0001        |
| Northeast                              |                      | 1.18 (0.58, 2.41)          | 0.65           |
| Midwest                                |                      | 2.94 (1.97, 4.37)          | <0.0001        |
| South                                  |                      | 1.34 (0.90, 2.00)          | 0.15           |
| Race/Ethnicity (vs. White)             | 31                   |                            | <0.0001        |
| Black                                  |                      | 0.75 (0.65, 0.87)          | 0.0001         |
| Asian                                  |                      | 0.81 (0.64, 1.03)          | 0.08           |
| Hispanic                               |                      | 0.64 (0.52, 0.79)          | <0.0001        |
| Other                                  |                      | 0.79 (0.60, 1.03)          | 0.08           |
| On Dialysis                            | 28                   | 0.77 (0.70, 0.85)          | <0.0001        |
| Female gender                          | 21                   | 0.95 (0.93, 0.97)          | <0.0001        |
| Age (per 5 year increase)              | 18                   |                            | <0.0001        |

|                                        |    |                   |            |
|----------------------------------------|----|-------------------|------------|
| Patients $\leq$ 60                     |    | 1.01 (0.99, 1.02) | 0.41       |
| Patients $>$ 60                        |    | 0.97 (0.96, 0.99) | $<$ 0.0001 |
| Prior PCI                              | 14 | 0.92 (0.88, 0.96) | 0.0002     |
| Length of stay (per 1 day increase)    | 14 |                   | 0.001      |
| Patients with LOS $\leq$ 3 days        |    | 1.10 (1.04, 1.17) | 0.002      |
| Patients with LOS $>$ 3 days           |    | 0.99 (0.98, 1.01) | 0.30       |
| Hospital size (per 50 bed increase)    | 11 |                   | 0.004      |
| Hospitals with $\leq$ 500 beds         |    | 1.12 (1.04, 1.20) | 0.001      |
| Hospitals with $>$ 500 beds            |    | 1.00 (1.00, 1.00) | 0.49       |
| BMI (per 5 kg/m <sup>2</sup> increase) | 8  |                   | 0.02       |
| Patients with BMI $\leq$ 30            |    | 1.03 (1.01, 1.05) | 0.005      |
| Patients with BMI $>$ 30               |    | 1.00 (1.00, 1.00) | 0.51       |
| Academic hospital                      | 7  | 0.57 (0.38, 0.87) | 0.009      |
| Dyslipidemia                           | 7  | 1.09 (1.02, 1.16) | 0.01       |
| Diabetes Mellitus                      | 6  | 0.96 (0.94, 0.99) | 0.01       |

Adjusted for all variables in table. Abbreviations: BMI: body mass index; CABG: coronary artery bypass graft; PCI: percutaneous coronary intervention; LV: left ventricular; STEMI: ST elevation myocardial infarction; LOS: length of stay.

**Supplemental Table 3.** Referral to cardiac rehabilitation among selected subgroups in 2007 vs. 2011.

|  | <b>2007</b>        | <b>2011</b>        | <b>4-year</b>    | <b>P-value for</b> |
|--|--------------------|--------------------|------------------|--------------------|
|  | <b>% referred*</b> | <b>% referred*</b> | <b>increase†</b> | <b>interaction</b> |

|                           | (N = 39525) | (N = 74163) | (%) | with time |
|---------------------------|-------------|-------------|-----|-----------|
| Overall                   | 73          | 79          | 6   |           |
| Gender                    |             |             |     | 0.71      |
| Male                      | 75          | 80          | 6   |           |
| Female                    | 69          | 76          | 7   |           |
| Race/Ethnicity            |             |             |     | 0.28      |
| White                     | 75          | 81          | 6   |           |
| Black                     | 63          | 71          | 8   |           |
| Asian                     | 67          | 75          | 8   |           |
| Hispanic                  | 57          | 68          | 11  |           |
| Other                     | 71          | 81          | 10  |           |
| Region                    |             |             |     | <0.0001   |
| West                      | 65          | 76          | 11  |           |
| Northeast                 | 59          | 76          | 16  |           |
| Midwest                   | 83          | 88          | 6   |           |
| South                     | 71          | 75          | 3   |           |
| Hospital Quality          |             |             |     | <0.0001   |
| Quartile I (lowest 25%)   | 54          | 64          | 10  |           |
| Quartile II               | 64          | 70          | 6   |           |
| Quartile III              | 76          | 81          | 5   |           |
| Quartile IV (highest 25%) | 87          | 87          | 0   |           |

\* p-value <0.0001 for differences within categories.

† 4-year increase may differ from subtraction of displayed values due to rounding.

Abbreviations: BMI: body mass index; PCI: percutaneous coronary intervention; CABG: coronary artery bypass graft; STEMI: ST elevation myocardial infarction; NSTEMI: non-ST elevation myocardial infarction.

## **Supplemental Figure Legend**

### **Supplemental Figure 1.**

**Inclusion and exclusion of participants in study population.**



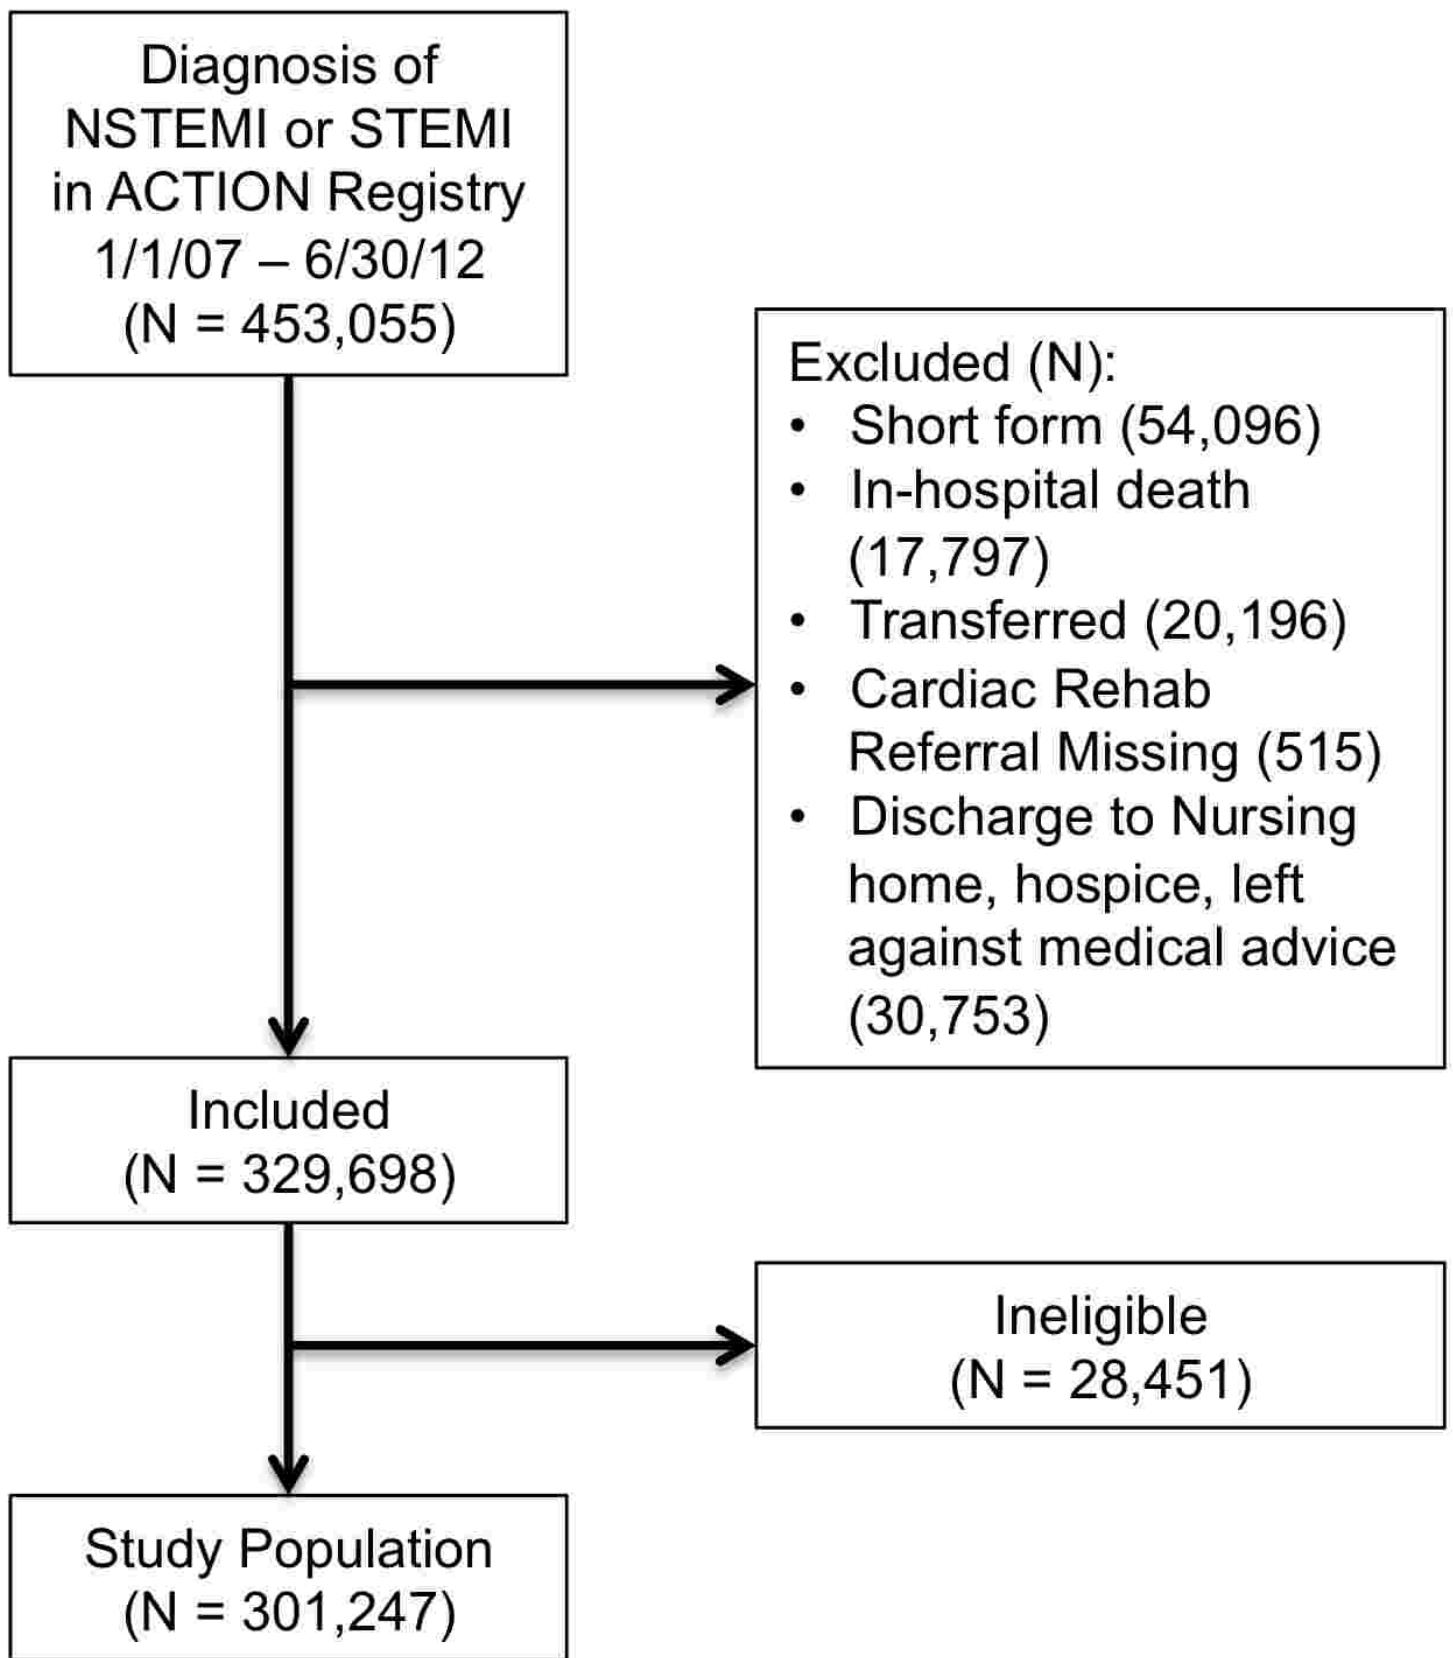

Supplement: NIHMS616893-supplement-supplement_1.pdf [file NIHMS616893-supplement-supplement_1.pdf]
